# Supplementary material for: Accuracy of lung ultrasound in diagnosing the etiology of respiratory symptoms in hospitalized children, a prospective cohort study
Source: Research Square preprint supplement (doi:10.21203/rs.3.rs-5461492/v1), 2025-05-06
Supplement: Supplementary file 1 [file 14dbe5b235c24ddddebd80da.docx]

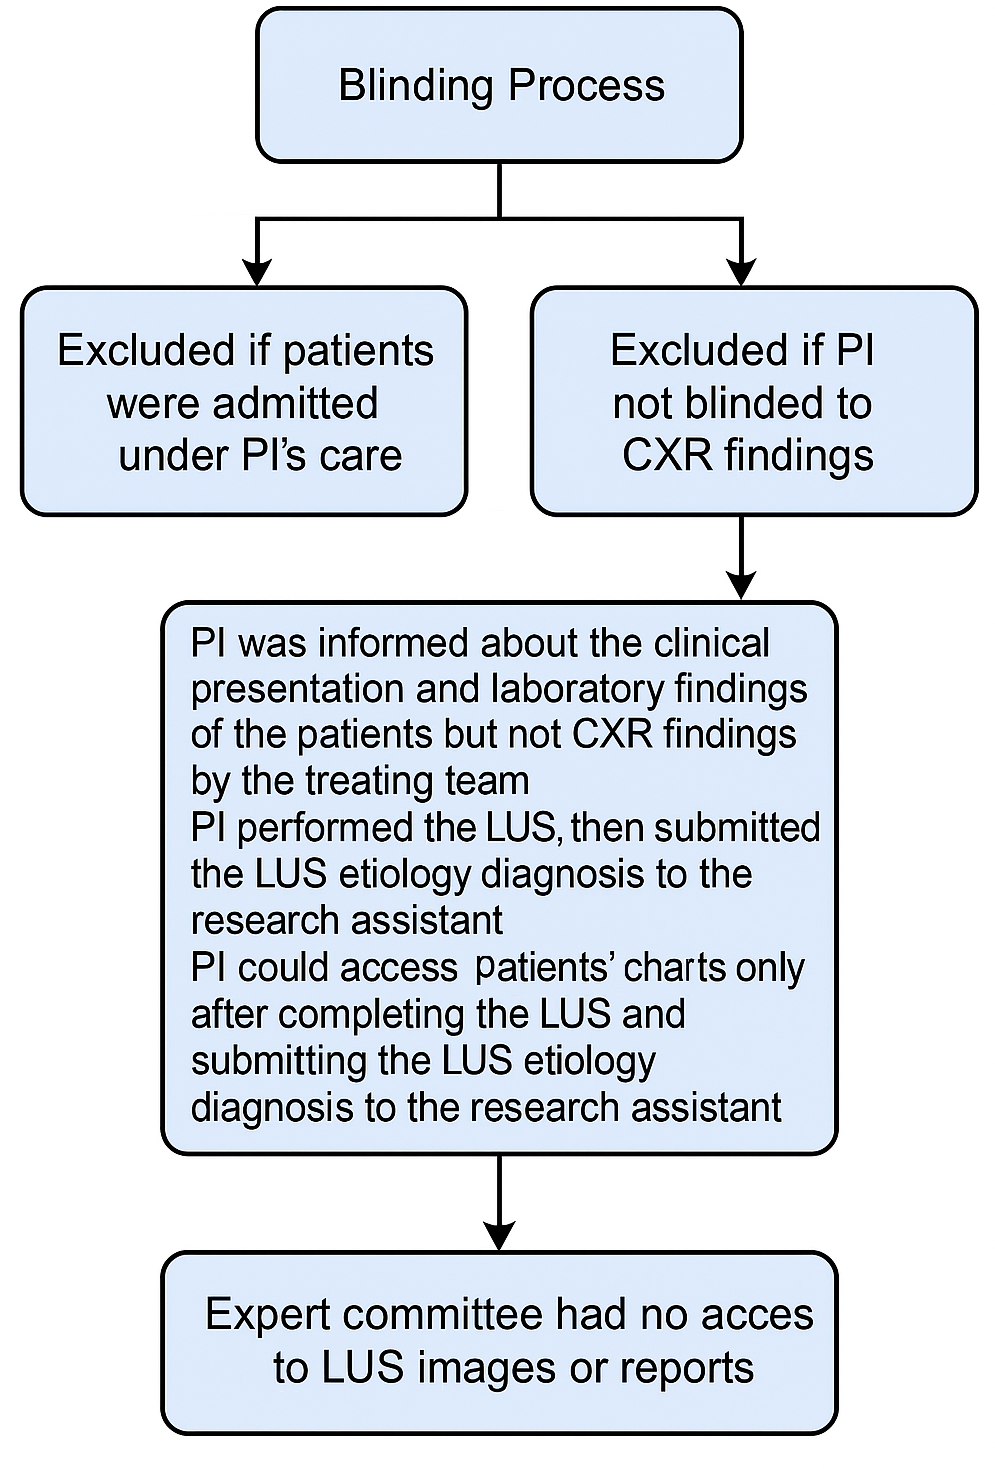


**Supplementary Figure S1**: Blinding process

**PI**: principal investigator; CXR: chest x-ray; LUS: lung ultrasound

| Marker | Bacterial Infection Median (IQR) | Viral Infection Median (IQR) | Asthma Median (IQR) |
| --- | --- | --- | --- |
| CRP (mg/L) | 84.9 (23.5 – 153.1) | 17.1 (3.6 – 75.6) | 13.0 (3.1 – 16.4) |
| WBC (×10⁹/L) | 13.8 (6.2 – 20.7) | 11.6 (8.6 – 18.0) | 13.4 (10.0 – 14.1) |
| ANC (×10⁹/L) | 10.3 (3.8 – 17.2) | 5.5 (2.9 – 9.6) | 10.3 (8.1 – 12.6) |
| NLR | 3.0 (1.6 – 8.8) | 1.1 (0.5 – 2.3) | 9.4 (3.5 – 25.1) |

Abbreviations:
CRP = C-reactive protein; WBC = White blood cell count; ANC = Absolute neutrophil count; NLR = Neutrophil-to-lymphocyte ratio; IQR = Interquartile range.

**Supplementary Table S2:** Laboratory Findings by Final Diagnosis

| **A** | **LUS Diagnosis vs Final Diagnosis age < 2 years (n=32)** | | |
| --- | --- | --- | --- |
|  | **Total Accuracy (95% CI)**  n positive = 32  n negative = 0 | **Bacterial (95% CI)**  n positive = 3  n negative = 29 | **Viral (95% CI)**  n positive = 28  n negative = 4 |
| **Sensitivity** | 90.6% (80.5, 100.0) | 66.7% (13.0-100.0) | 92.9% (83.0, 100.0) |
| **Specificity** | NA* | 93.1% (83.9, 100.0) | 75% (33,0, 99.9) |
| **Overall agreement** | 90.6% (80.5, 100.0) | 90.6% (80.5, 100.0) | 90.6% (80.5, 100.0) |

* There were no negative cases to measure specificity

| **B** | **LUS Diagnosis vs Final Diagnosis Age ≥ 2 years (n=33)** | | |
| --- | --- | --- | --- |
|  | **Total Accuracy (95% CI)**  n positive = 30  n negative = 3 | **Bacterial (95% CI)**  n positive = 9  n negative = 24 | **Viral (95% CI)**  n positive = 15  n negative = 18 |
| **Sensitivity** | 93.3 (78.7, 100,0) | 100%(71.7, 100.0) | 86.7% (69.0, 100.0) |
| **Specificity** | 100 (36.8, 100) | 91.7% (80.6, 100.0) | 100% (84.7, 100.0) |
| **Overall agreement** | 93.9% (85.0, 100.0) | 93.9% (85.0, 100.0) | 93.9% (85.0, 100.0) |

**Supplementary Table S3:** Subgroup analysis. (A) age < 2 years. (B) age ≥2 years

LUS: lung ultrasound; CI: confidence interval
